# Supplementary material for: A comparative study of pomegranate Sb@C yolk–shell microspheres as Li and Na-ion battery anodes
Source: Royal Society of Chemistry journal article supplement (doi:10.1039/c8nr08461k), 2018-11-16
Supplement: c8nr08461k1.pdf [file c8nr08461k1.pdf]

# A Comparative Study of Pomegranate Sb@C Yolk-Shell Microspheres as Li and Na-Ion Battery Anodes

Junhua Song<sup>1,2</sup>, Dongdong Xiao<sup>1</sup>, Haiping Jia<sup>1</sup>, Guomin Zhu<sup>1</sup>, Mark Engelhard<sup>1</sup>, Biwei Xiao<sup>1</sup>, Shuo Feng<sup>2</sup>, Dongsheng Li<sup>1</sup>, David Reed<sup>1</sup>, Vincent L. Sprenkle<sup>1</sup>, Yuehe Lin<sup>2\*</sup> and Xiaolin Li<sup>1\*</sup>

1. Pacific Northwest National Laboratory, 902 Battelle Boulevard Richland, WA, 99354, USA

2. School of Mechanical and Materials Engineering, Washington State University, Pullman, WA 99164, USA

Correspondence should be addressed to: [yuehe.lin@wsu.edu](mailto:yuehe.lin@wsu.edu); [xiaolin.Li@pnnl.gov](mailto:xiaolin.Li@pnnl.gov)

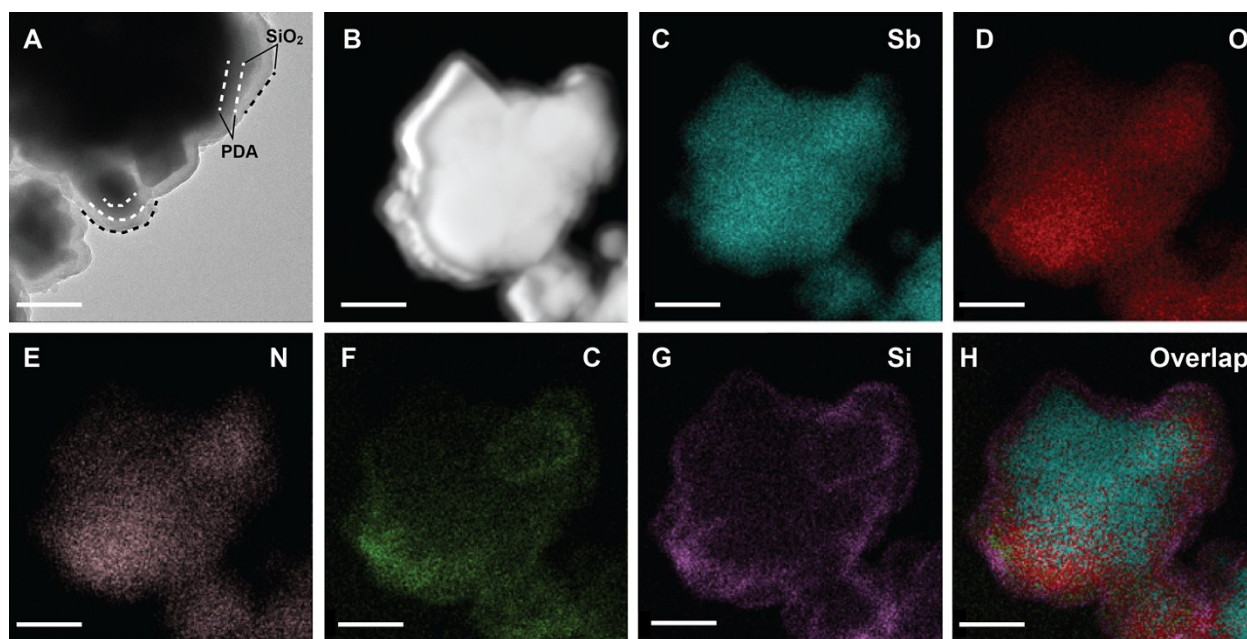

**Figure S1.** (A) A typical TEM image of the core-shell structured Sb<sub>2</sub>O<sub>3</sub>@PDA@SiO<sub>2</sub>. (B) A typical STEM image of a Sb<sub>2</sub>O<sub>3</sub>@PDA@SiO<sub>2</sub> particle. (C) to (G) The corresponding elemental mapping of Sb, O, N, C and Si for the particle in (B). (H) Overlapped elemental mapping of (C) to (G). The scale bars are 200 nm.

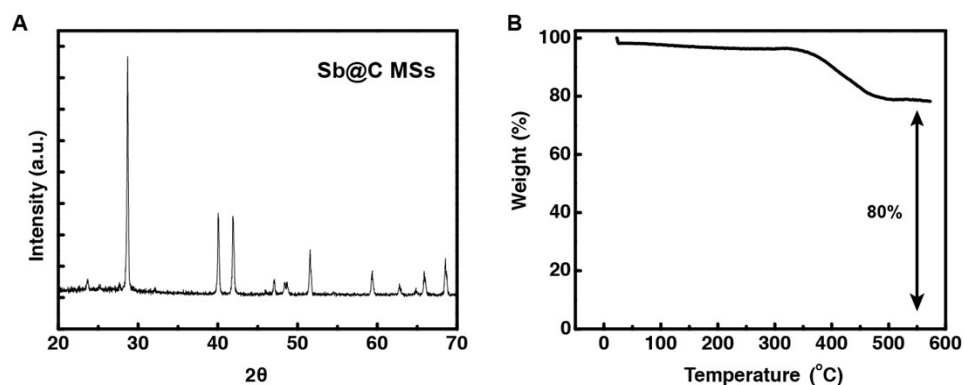

**Figure S2.** (A) A typical XRD pattern of Sb@C MSs. (B) TGA curve of Sb@C MSs.

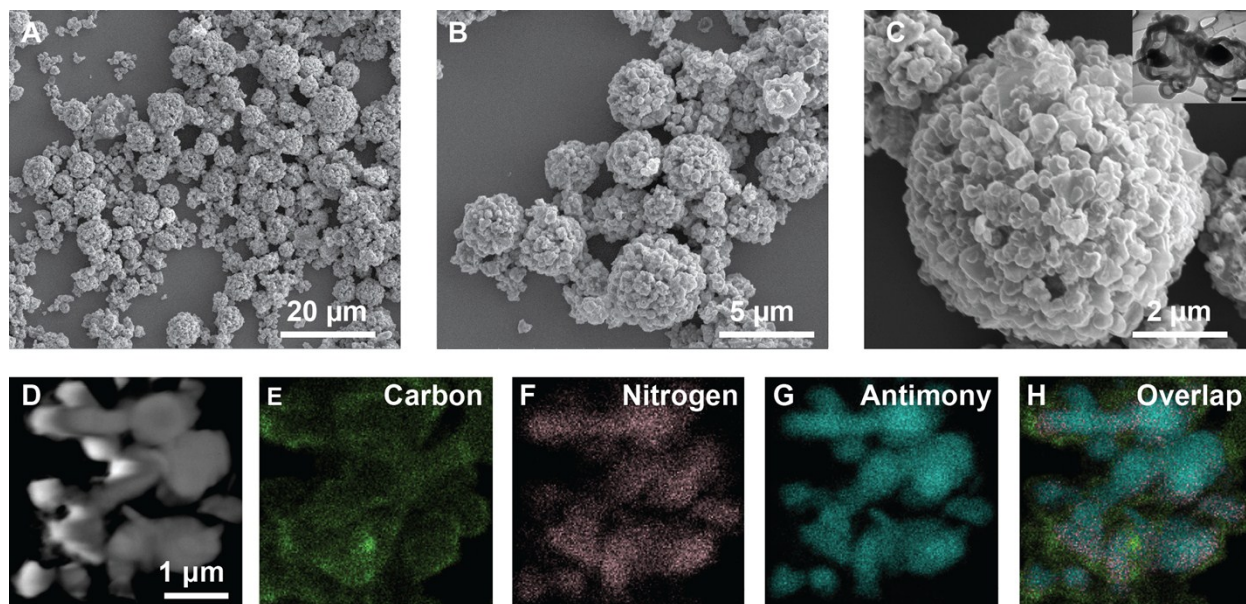

**Figure S3.** (A-C) Typical SEM images of Sb@C MSs; inset in C is a typical TEM image of yolk-shell Sb@C primary particle. The scale-bar is 200nm. (D) STEM image of a typical Sb@C MS. (E-G) The corresponding elemental mapping of carbon, nitrogen and antimony. (H) Overlapped elemental mapping of (E) to (G).

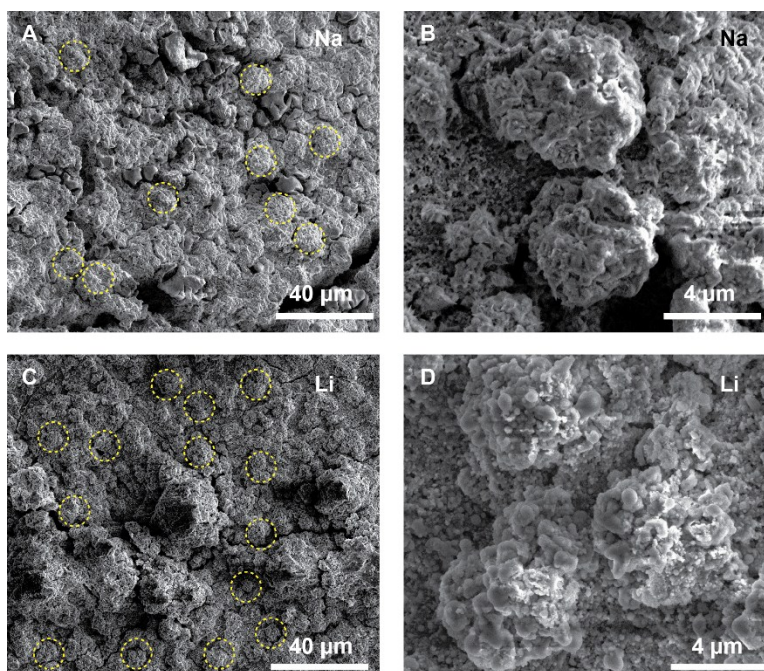

**Figure S4.** SEM images of Sb@C MS electrodes cycled in SIBs (A-B) and LIBs (C-D). Some Sb@C MSs are marked with dashed yellow circles.

**Table S1.** Impedance evolution of Sb@C MSs in LIBs and SIBs.  $R_{ohm}$  and  $R_{ct}$  represent ohmic and charge-transfer resistances, respectively.

|                    | Fresh |     | 1 <sup>st</sup> |     | 5 <sup>th</sup> |     | 10 <sup>th</sup> |     | 50 <sup>th</sup> |      | 150 <sup>th</sup> |     | Replacement |     |
|--------------------|-------|-----|-----------------|-----|-----------------|-----|------------------|-----|------------------|------|-------------------|-----|-------------|-----|
|                    | Li    | Na  | Li              | Na  | Li              | Na  | Li               | Na  | Li               | Na   | Li                | Na  | Li          | Na  |
| $R_{ohm} (\Omega)$ | 3.8   | 5.1 | 4.1             | 3.7 | 4.7             | 4.2 | 4.9              | 4.2 | 6.1              | 10.4 | 7.5               | 8.6 | 3.5         | 4.1 |
| $R_{ct} (\Omega)$  | 94    | 630 | 19              | 37  | 13              | 30  | 13               | 34  | 21               | 188  | 46                | 295 | 30          | 107 |

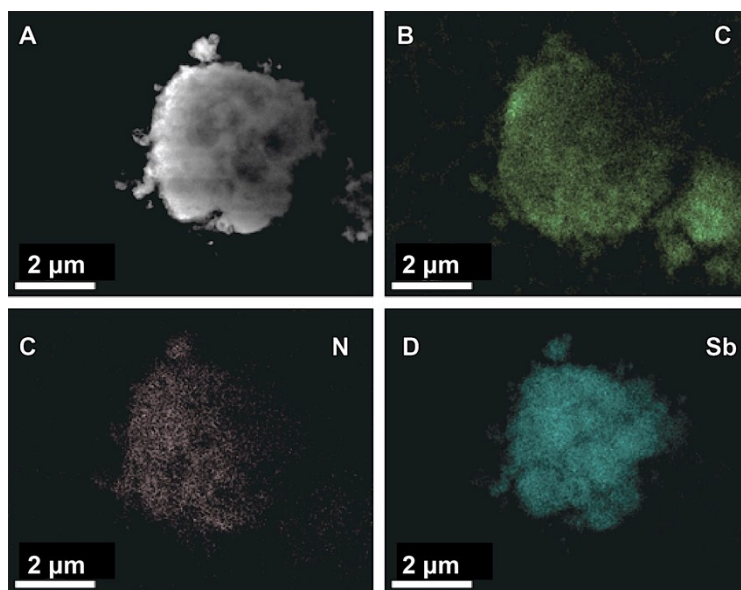

**Figure S5.** (A) STEM image of a Sb@C MS cyclized in LIB and the corresponding elemental mapping of carbon (B), nitrogen (C) and Sb (D).

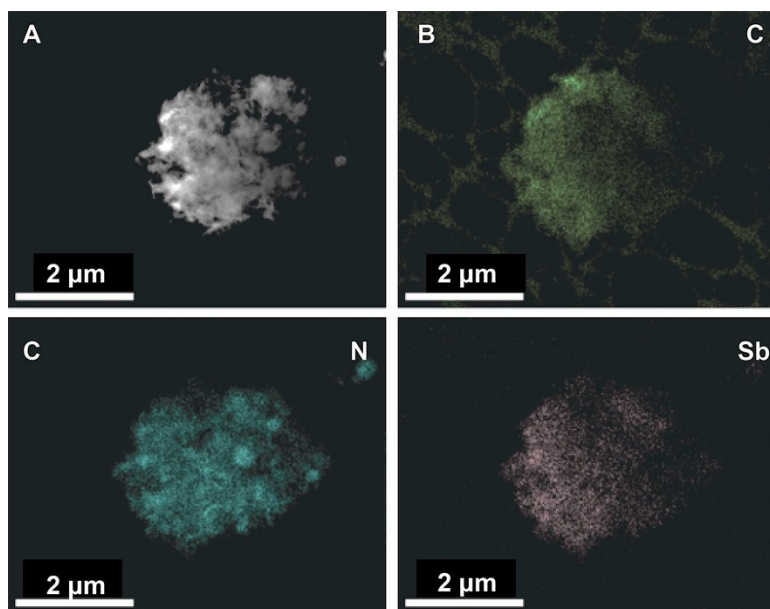

**Figure S6.** (A) STEM image of a Sb@C MS cyclized in SIBs and the corresponding elemental mapping of carbon (B), nitrogen (C) and Sb (D).
